# Supplementary material
Source: PubMed Central journal article supplement (PMC3123088)

## A Novel Vinculin Binding Site of the IpaA invasin of *Shigella*

HaJeung Park<sup>¶</sup>, Cesar Valencia-Gallardo<sup>§</sup>, Andrew Sharff<sup>‡</sup>, Guy Tran Van Nhieu<sup>§</sup>,  
and Tina Izard<sup>¶1</sup>

*From the <sup>¶</sup>Cell Adhesion Laboratory, Department of Cancer Biology, The Scripps Research Institute, Jupiter, Florida 33458, USA; the <sup>§</sup>CIRB, Collège de France, Unité de Communications Intercellulaires et Infections Microbiennes, DR2 Inserm U971, 75005 Paris Cedex, France; and <sup>‡</sup>Global Phasing Ltd, Sheraton House, Castle Park, Cambridge CB3 0AX, England*

<sup>1</sup>To whom correspondence should be addressed

### SUPPLEMENTARY METHODS

*Cloning, expression, and purification of IpaA(45-633)* – The cDNA encoding residues 45 to 633 of IpaA was amplified by PCR from a virulence plasmid derived from the *Shigella flexneri* ΔIpaBC strain. We removed the *N*-terminal chaperone-binding domain (residues 1-44) to improve the solubility of IpaA. The PCR product was cloned into the *NdeI/EcoRI* restriction sites of the pET30a vector (Novagen) to generate pET30a-IpaA45-633. A heptahistidine-tag was added to the *C*-terminus to facilitate purification. The plasmid was then transformed into *E. coli* BL21(DE3) strain (Novagen). BL21(DE3) cells harboring pET30a-IpaA(45-633) were grown in auto-induction media (24) overnight at 30 °C. The cells were harvested and sonicated in an ice bath. After centrifugation at 10,000 x *g* for 20 min, the pellet was solubilized by resuspension in 6 M urea followed by centrifugation at 20,000 x *g* for 20 min. The supernatant was loaded onto a His-Trap HP chelating affinity chromatography column (GE Healthcare) pre-equilibrated with 6 M urea and 5 mM imidazole (pH 8). The column was washed with 40 column volumes of the equilibration buffer. IpaA 45-633 was eluted with 10 mM Tris-HCl (pH 8), 50 mM imidazole, 300 mM NaCl, 1 mM DTT, and 30 mM L-Arg. IpaA 45-633 was concentrated to ~4 mg/ml.

*Analytical size exclusion chromatography* – To determine the total number of available VBSs in IpaA that can bind to vinculin, we determined the stoichiometry of the interaction, by incubating almost full-length IpaA (residues 45-633) with increasing amounts of Vh1 and then analyzing the complex using analytical size exclusion chromatography. Protein samples (200 μl) containing IpaA and Vh1 at molar ratios of 1:5, 1:4, 1:3, 1:2, and 1:1, as well as IpaA alone and Vh1 alone were prepared by dilution in running buffer (10 mM Tris-HCl [pH 7.5], 150 mM NaCl, 50 mM L-Arg, and 2 mM DTT). L-Arg was necessary to prevent aggregation. The prepared samples were incubated at room temperature for 20 min before they were loaded onto a Superdex 200 10 x 3000 (GE Healthcare) analytical sizing chromatography column at a flow rate of 0.5 ml/min using an Äkta FPLC system (GE Healthcare). Peak fractions were collected and analyzed by SDS-PAGE.

**FIGURE LEGENDS**

**Supplementary Figure S1. Temperature factor plot of IpaA-VBS3.** The temperature factor for each C $\alpha$  IpaA-VBS3 atom is plotted in red and blue, respectively, for the two IpaA-VBS3 molecules in the asymmetric unit.

**Supplementary Figure S2. Comparison of IpaA-VBS3 and IpaA-VBS1 interactions with Vh1.** The Vh1:IpaA-VBS1 interactions are based on the 2.72 Å crystal structure (PDB entry 2gww), and this was compared to our 1.6 Å Vh1:IpaA-VBS3 structure presented here. IpaA-VBS3 (A) or IpaA-VBS1 (B) residues are labeled in blue while Vh1 interacting residues are labeled in black. Vh1 residues listed on the left of IpaA-VBS engage in polar inter-molecular interactions, while Vh1 residues listed on the right of IpaA-VBS residues engage in hydrophobic inter-molecular interactions. Structurally equivalent IpaA-VBS3 and IpaA-VBS1 residues are on the same line (*e.g.*, IpaA-VBS3 residue Ile-492 corresponds to IpaA-VBS1 residue Ile-612). The greater number of residues involved in the Vh1-IpaA-VBS3 interface is reflected in about 10% increase in buried surface area.

**Supplementary Figure S3. Comparison of IpaA-VBS3 and IpaA-VBS2 interactions with Vh1.** The Vh1:IpaA-VBS2 interactions are based on the 3.97 Å crystal structure (PDB entry 2hsq), and this was compared to our 1.6 Å Vh1:IpaA-VBS3 structure presented here. IpaA-VBS3 (A) or IpaA-VBS2 (B) residues are labeled in blue while Vh1 interacting residues are labeled in black. Vh1 residues listed on the left of IpaA-VBS engage in polar inter-molecular interactions, while Vh1 residues listed on the right of IpaA-VBS residues engage in hydrophobic inter-molecular interactions. Structurally equivalent IpaA-VBS3 and IpaA-VBS2 residues are on the same line (*e.g.* IpaA-VBS3 residue Ile-492 corresponds to IpaA-VBS2 residue Ile-566).

**Supplementary Figure S4. Stoichiometry of the Vh1: IpaA complex as determined by size exclusion chromatography.** Constant IpaA (residues 45-633) amounts were mixed with increasing molar ratios of Vh1. IpaA to Vh1 molar ratios were (A) 1:5, (B) 1:4, (C) 1:3, (D) 1:2, and (E) 1:1. IpaA alone (F) and Vh1 alone (G, shown twice for clarity) are also shown. Samples were applied to a Superdex 200 10 x 300 sizing chromatography column. The position of the absorption peak corresponding to the IpaA:Vh1 complex advanced (IpaA:Vh1 molar ratio of 1:0, the green dotted line indicates its peak position; 1:1, red; 1:2, blue; 1:3, grey) until the IpaA:Vh1 molar ratio reaches 1:3 and IpaA is saturated. Thus, IpaA can simultaneously bind up to three molecules of Vh1. The absorption peak of free Vh1 (orange dotted line) appears at a molar IpaA:Vh1 ratio of 1:4 (B) and 1:5 (A).

**Supplementary Figure S5. SDS-PAGE analysis of peak fractions from the size exclusion chromatography experiment.** The identity of the peaks from the size exclusion chromatography experiment (Fig. S4) was confirmed by 8% - 25% gradient SDS-PAGE. *Lanes* 1 and 2, samples were taken at 10 ml elution corresponding to the saturated Vh1:IpaA complex ( $M_r = 154$  kDa), *lanes* 3 and 4 at 10.9 ml corresponding to IpaA alone (residues 45-633,  $M_r = 67$  kDa), and *lanes* 5 and 6 at 15.2 ml corresponding to Vh1 alone (residues 1-258,  $M_r = 29$  kDa).

Supplementary Figure S1

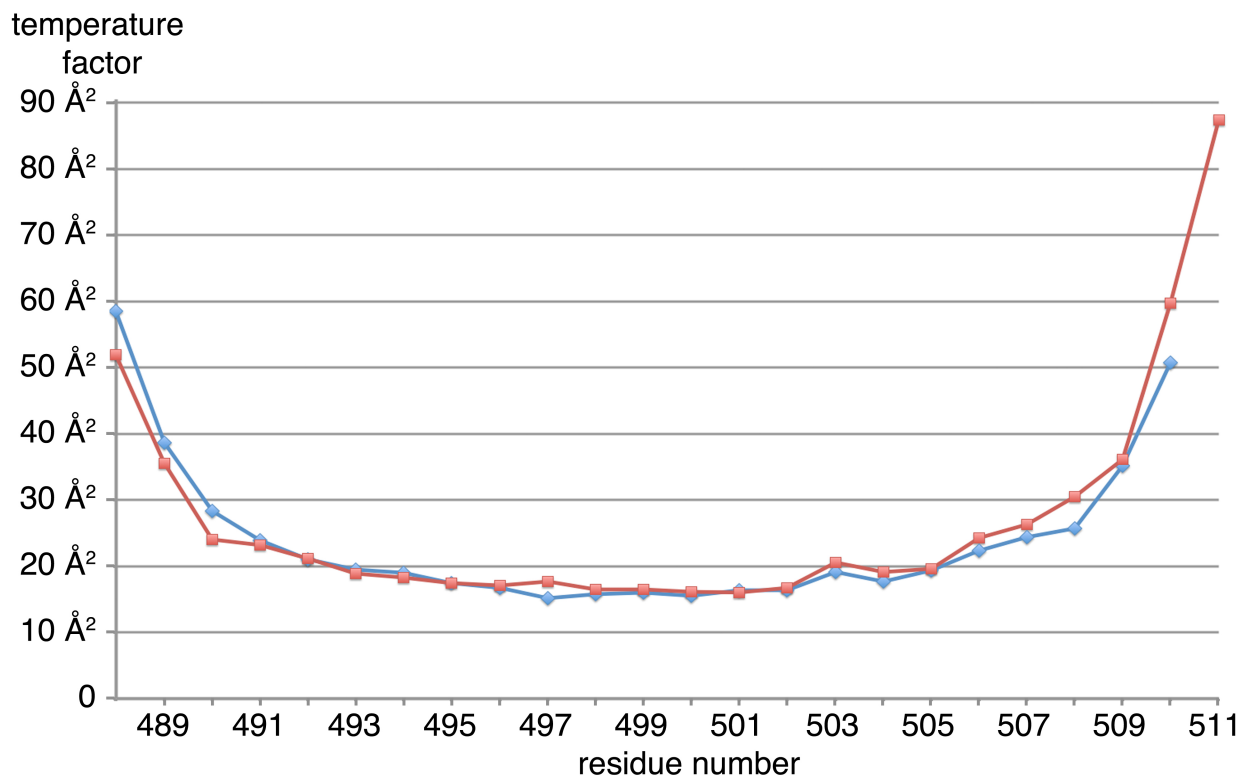

Supplementary Figure S2

A

| polar Vh1 | <a href="#">IpaA-VBS3</a> | hydrophobic interactions Vh1 |
|-----------|---------------------------|------------------------------|
| E60       | <a href="#">R489</a>      | E60                          |
| M53       | <a href="#">E490</a>      |                              |
|           | <a href="#">T491</a>      | V57                          |
|           | <a href="#">I492</a>      | L54, V57, G58, F126          |
|           | <a href="#">F493</a>      | T8, I12, L123                |
|           | <a href="#">E494</a>      |                              |
|           | <a href="#">A495</a>      | L54, V57                     |
|           | <a href="#">S496</a>      | I12, T119                    |
| S11, E14  | <a href="#">K497</a>      | I12                          |
|           | <a href="#">K498</a>      | A50                          |
|           | <a href="#">V499</a>      | A50, V51, L54, I115          |
|           | <a href="#">T500</a>      | V16                          |
|           | <a href="#">N501</a>      |                              |
|           | <a href="#">S502</a>      | V47                          |
|           | <a href="#">L503</a>      | V16, I20, S112, I115         |
| Q19       | <a href="#">S504</a>      | V16                          |
|           | <a href="#">N505</a>      |                              |
|           | <a href="#">L506</a>      | L40, P43, V44, L88           |
|           | <a href="#">I507</a>      | V16, I20, L23                |
| Q19       | <a href="#">S508</a>      |                              |
|           | <a href="#">L509</a>      | L40, P43                     |
|           | <a href="#">I510</a>      | L108                         |

B

| polar Vh1 | <a href="#">IpaA-VBS1</a> | hydrophobic interactions Vh1 |
|-----------|---------------------------|------------------------------|
|           | <a href="#">I612</a>      | V57, F126                    |
|           | <a href="#">Y613</a>      | T8, L123, F126               |
|           | <a href="#">K614</a>      |                              |
|           | <a href="#">A615</a>      | L54                          |
|           | <a href="#">A616</a>      | I12, L123                    |
|           | <a href="#">K617</a>      |                              |
|           | <a href="#">D618</a>      | A50                          |
|           | <a href="#">V619</a>      | A50, V51, I115               |
| I12       | <a href="#">T620</a>      | L13, V16                     |
|           | <a href="#">T621</a>      |                              |
|           | <a href="#">S622</a>      | A46, V47                     |
|           | <a href="#">L623</a>      | V16                          |
| Q19       | <a href="#">S624</a>      | V16, Q19                     |
|           | <a href="#">K625</a>      |                              |
|           | <a href="#">V626</a>      | P43                          |
|           | <a href="#">L627</a>      | I20                          |

Supplementary Figure S3

A

| polar Vh1 | <a href="#">IpaA-VBS3</a> | hydrophobic interactions Vh1 |
|-----------|---------------------------|------------------------------|
| E60       | <a href="#">R489</a>      | E60                          |
| M53       | <a href="#">E490</a>      |                              |
|           | <a href="#">T491</a>      | V57                          |
|           | <a href="#">I492</a>      | L54, V57, G58, F126          |
|           | <a href="#">F493</a>      | T8, I12, L123                |
|           | <a href="#">E494</a>      |                              |
|           | <a href="#">A495</a>      | L54, V57                     |
|           | <a href="#">S496</a>      | I12, T119                    |
| S11, E14  | <a href="#">K497</a>      | I12                          |
|           | <a href="#">K498</a>      | A50                          |
|           | <a href="#">V499</a>      | A50, V51, L54, I115          |
|           | <a href="#">T500</a>      | V16                          |
|           | <a href="#">N501</a>      |                              |
|           | <a href="#">S502</a>      | V47                          |
|           | <a href="#">L503</a>      | V16, I20, S112, I115         |
| Q19       | <a href="#">S504</a>      | V16                          |
|           | <a href="#">N505</a>      |                              |
|           | <a href="#">L506</a>      | L40, P43, V44, L88           |
|           | <a href="#">I507</a>      | V16, I20, L23                |
| Q19       | <a href="#">S508</a>      |                              |
|           | <a href="#">L509</a>      | L40, P43                     |
|           | <a href="#">I510</a>      | L108                         |

B

| polar Vh1 | <a href="#">IpaA-VBS2</a> | hydrophobic interactions Vh1 |
|-----------|---------------------------|------------------------------|
|           | <a href="#">A565</a>      | V57                          |
|           | <a href="#">I566</a>      | L123, F126                   |
| D127      | <a href="#">Y567</a>      | T8, I9, L123, F126           |
|           | <a href="#">E568</a>      |                              |
|           | <a href="#">K569</a>      | L54, V57                     |
|           | <a href="#">A570</a>      | L54, L123                    |
|           | <a href="#">K571</a>      | I12                          |
|           | <a href="#">E572</a>      |                              |
|           | <a href="#">V573</a>      | A50, V51                     |
| I12       | <a href="#">S574</a>      |                              |
|           | <a href="#">S575</a>      |                              |
|           | <a href="#">A576</a>      |                              |
|           | <a href="#">L577</a>      | V16, V47, I88, S112          |
| Q19       | <a href="#">S578</a>      |                              |
|           | <a href="#">K579</a>      |                              |
|           | <a href="#">V580</a>      | P43, V44                     |
|           | <a href="#">L581</a>      | V16, I20, S112               |
|           | <a href="#">S582</a>      |                              |
|           | <a href="#">K583</a>      | L37, P38, L40                |
|           | <a href="#">I584</a>      | L23, I37, L40                |
|           | <a href="#">D585</a>      | L23                          |

Supplementary Figure S4

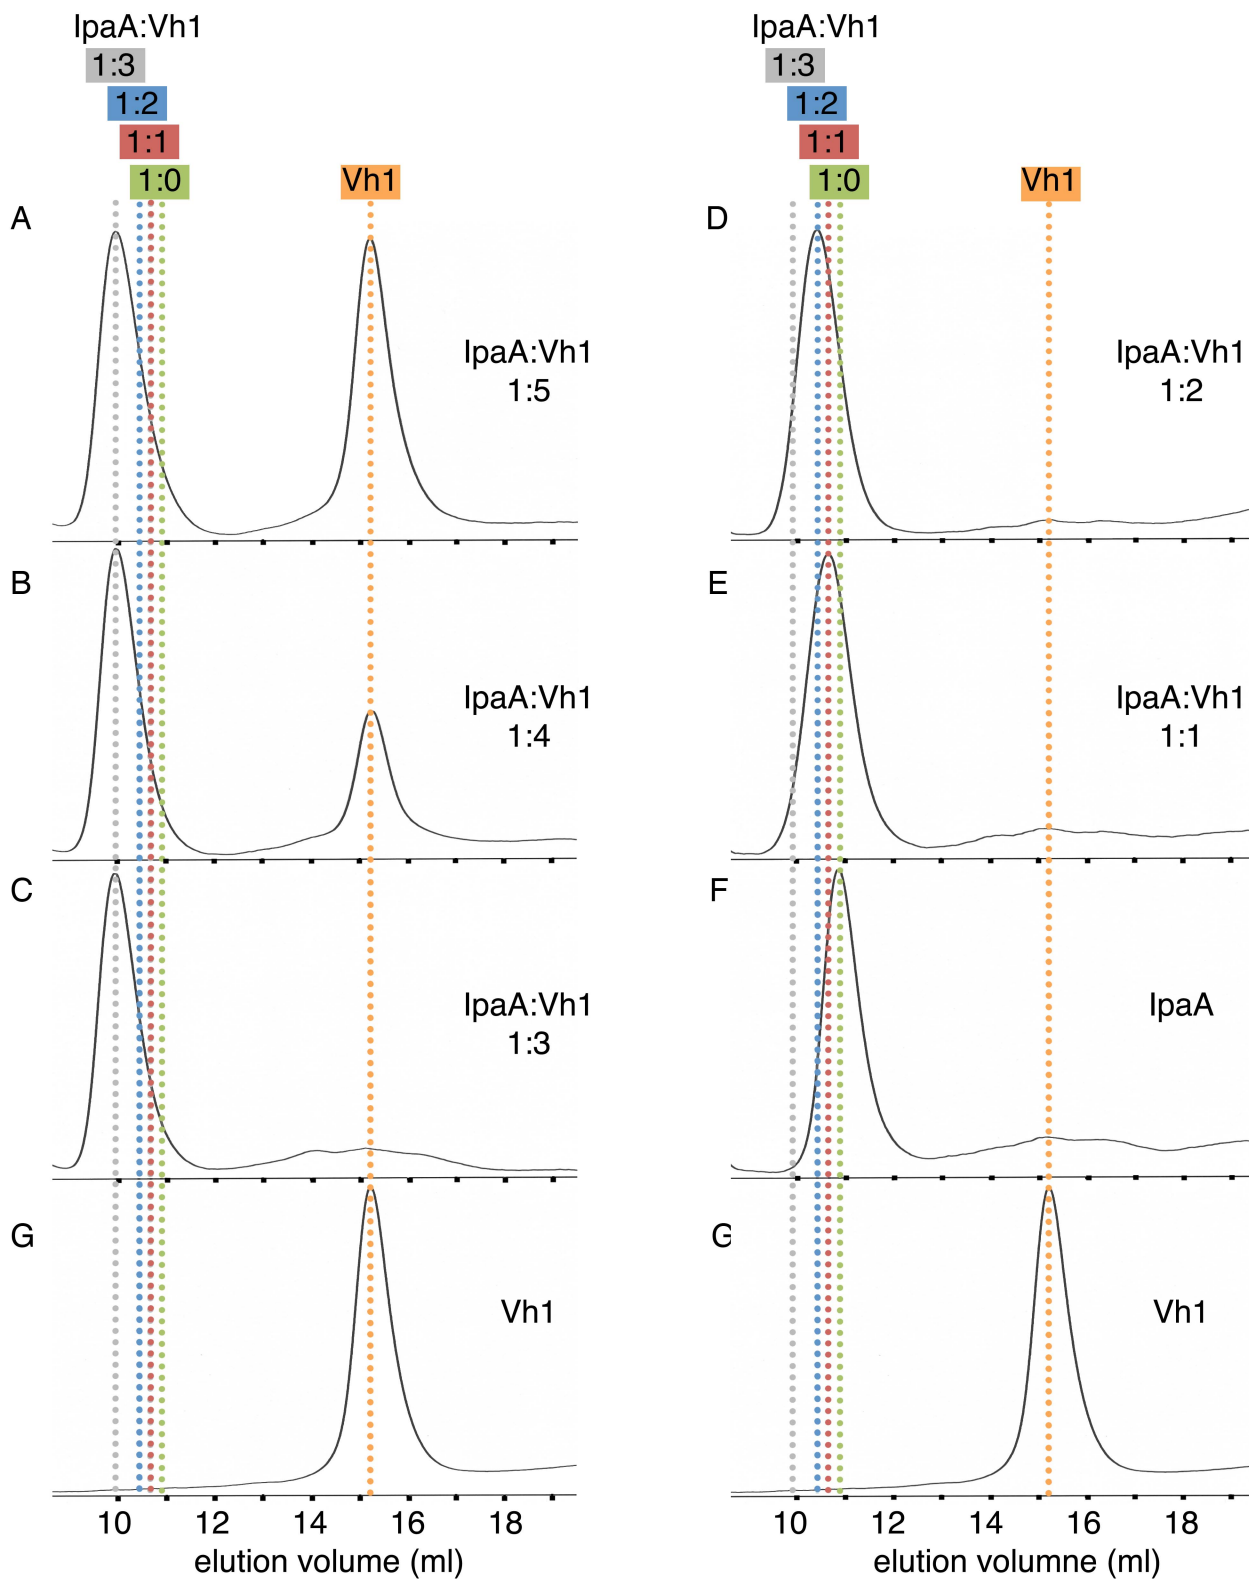

Supplementary Figure S5

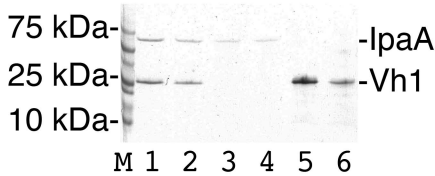

Supplement: supp_M110.184283_jbc.M110.184283-1.pdf [file supp_M110.184283_jbc.M110.184283-1.pdf]
